# Supplementary material for: Axial zero-field splitting in mononuclear Co(ii) 2-N substituted N-confused porphyrin: Co(2-NC3H5-21-Y-CH2C6H4CH3-NCTPP)Cl (Y = o, m, p) and Co(2-NC3H5-21-CH2C6H5-NCTPP)Cl
Source: Royal Society of Chemistry journal article supplement (doi:10.1039/c6dt00137h), 2016-01-01
Supplement: c6dt00137h1.pdf [file c6dt00137h1.pdf]

## Electronic supplementary information (ESI)

(18 pages)

**Axial zero-field splitting in mononuclear Co(II) 2-N**

**substituted N-Confused porphyrin:**

**Co(2-NC<sub>3</sub>H<sub>5</sub>-21-Y-CH<sub>2</sub>C<sub>6</sub>H<sub>4</sub>CH<sub>3</sub>-NCTPP)Cl (Y = *o*, *m*, *p*)**

**and Co(2-NC<sub>3</sub>H<sub>5</sub>-21-CH<sub>2</sub>C<sub>6</sub>H<sub>5</sub>-NCTPP)Cl**

**Ya-Yuan Lai,<sup>a</sup> Yu-Chang Chang,<sup>a</sup> Jyh-Horung Chen,<sup>\*a</sup> Shin-Shin Wang,<sup>b</sup> and Jo-Yu Tung<sup>c</sup>**

<sup>a</sup>Department of Chemistry, National Chung Hsing University, Taichung 40227, Taiwan. E-mail: [u9812038@ems.ndhu.edu.tw](mailto:u9812038@ems.ndhu.edu.tw); E-mail: [ycchang@dragon.nuhu.edu.tw](mailto:ycchang@dragon.nuhu.edu.tw); E-mail: [JyhHChen@dragon.nuhu.edu.tw](mailto:JyhHChen@dragon.nuhu.edu.tw); Fax: +886 422862547; Tel: +886 4228404112x612.

<sup>b</sup>Material and Chemical Research Laboratories, ITRI, Hsin-Chu 300, Taiwan. E-mail: [ShinShinWang@ITRI.org.tw](mailto:ShinShinWang@ITRI.org.tw); Tel: +886 35732550

<sup>c</sup>Department of Occupational Safety and Health, Chung Hwai University of Medical Technology, Tainan 717, Taiwan. E-mail: [joyuting@mail.hwai.edu.tw](mailto:joyuting@mail.hwai.edu.tw); Fax: +886 62894028; Tel: +886 62674567x815

## Contents

|                                                                                                                                                                                                                                               |     |
|-----------------------------------------------------------------------------------------------------------------------------------------------------------------------------------------------------------------------------------------------|-----|
| 1. Fig. S1. X-ray structure of <b>1</b> .....                                                                                                                                                                                                 | S2  |
| 2. Fig. S2. X-ray structure of <b>3</b> .....                                                                                                                                                                                                 | S3  |
| 3. Fig. S3. X-ray structure of <b>7</b> .....                                                                                                                                                                                                 | S4  |
| 4. Fig. S4. X-ray structure of <b>8</b> .....                                                                                                                                                                                                 | S5  |
| 5. Fig. S5. X-ray structure of <b>9</b> .....                                                                                                                                                                                                 | S6  |
| 6. Fig. S6. X-ray structure of <b>10</b> .....                                                                                                                                                                                                | S7  |
| 7. Fig. S7. UV-Vis spectra of <b>1</b> .....                                                                                                                                                                                                  | S8  |
| 8. Fig. S8. UV-Vis spectra of <b>3</b> .....                                                                                                                                                                                                  | S8  |
| 9. Fig. S9. UV-Vis-NIR spectra of <b>7</b> .....                                                                                                                                                                                              | S9  |
| 10. Fig. S10. UV-Vis-NIR spectra of <b>8</b> .....                                                                                                                                                                                            | S10 |
| 11. Fig. S11. UV-Vis-NIR spectra of <b>9</b> .....                                                                                                                                                                                            | S11 |
| 12. Fig. S12. UV-Vis-NIR spectra of <b>10</b> .....                                                                                                                                                                                           | S12 |
| 13. Fig. S13. SQUID diagram of <b>7</b> .....                                                                                                                                                                                                 | S13 |
| 14. Fig. S14. SQUID diagram of <b>8</b> .....                                                                                                                                                                                                 | S13 |
| 15. Fig. S15. SQUID diagram of <b>9</b> .....                                                                                                                                                                                                 | S14 |
| 16. Fig. S16. SQUID diagram of <b>10</b> .....                                                                                                                                                                                                | S14 |
| 17. Fig. S17. <sup>1</sup> H NMR spectra for <b>3</b> .....                                                                                                                                                                                   | S15 |
| 18. Table S1. X-ray, <sup>1</sup> H (599.93 MHz) and <sup>13</sup> C (150.87 MHz) NMR chemical shifts of<br>the N(4)-CH(19)(Ar) [or N(4) <sup>+</sup> =CH(19)(Ar)] fragment in CDCl <sub>3</sub> at 293 K<br>for <b>1 – 3, 7 – 10</b> . ..... | S16 |
| 19. Derivation of D <sub>xx</sub> , D <sub>yy</sub> , D <sub>zz</sub> and D .....                                                                                                                                                             | S17 |

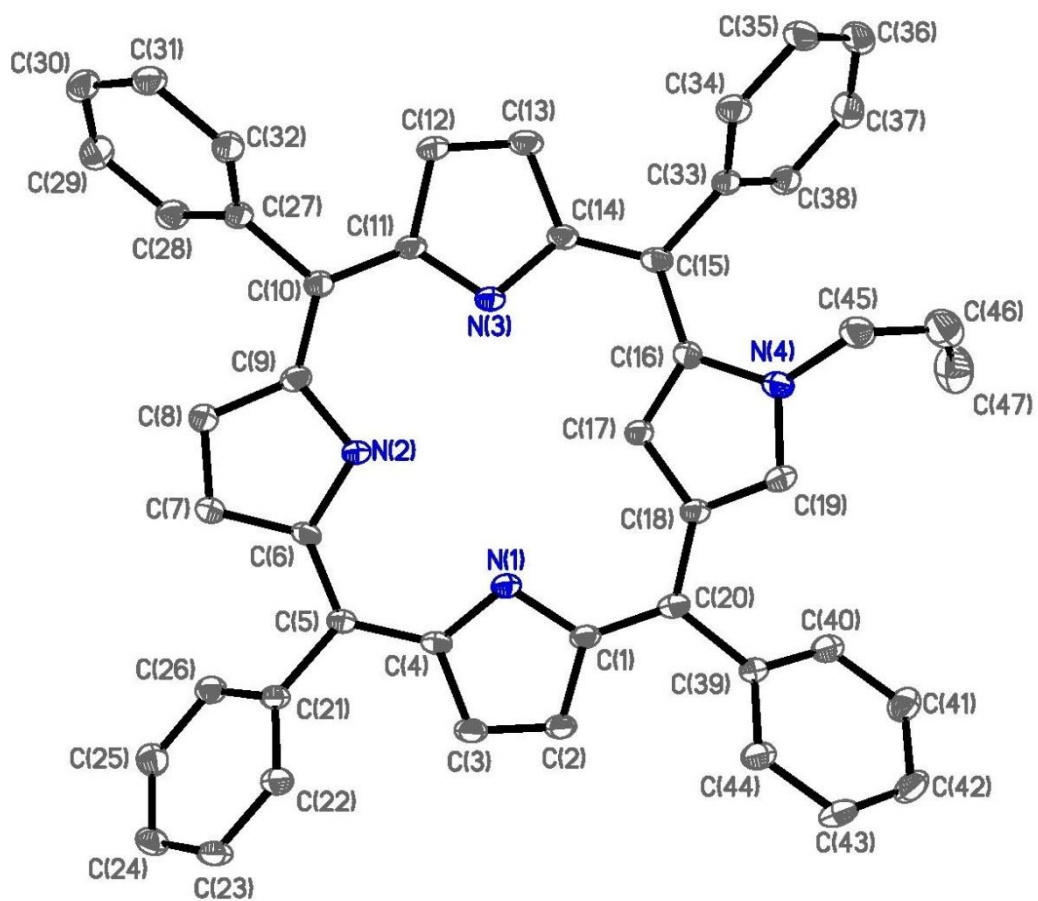

Fig. S1. X-ray structure of 1.

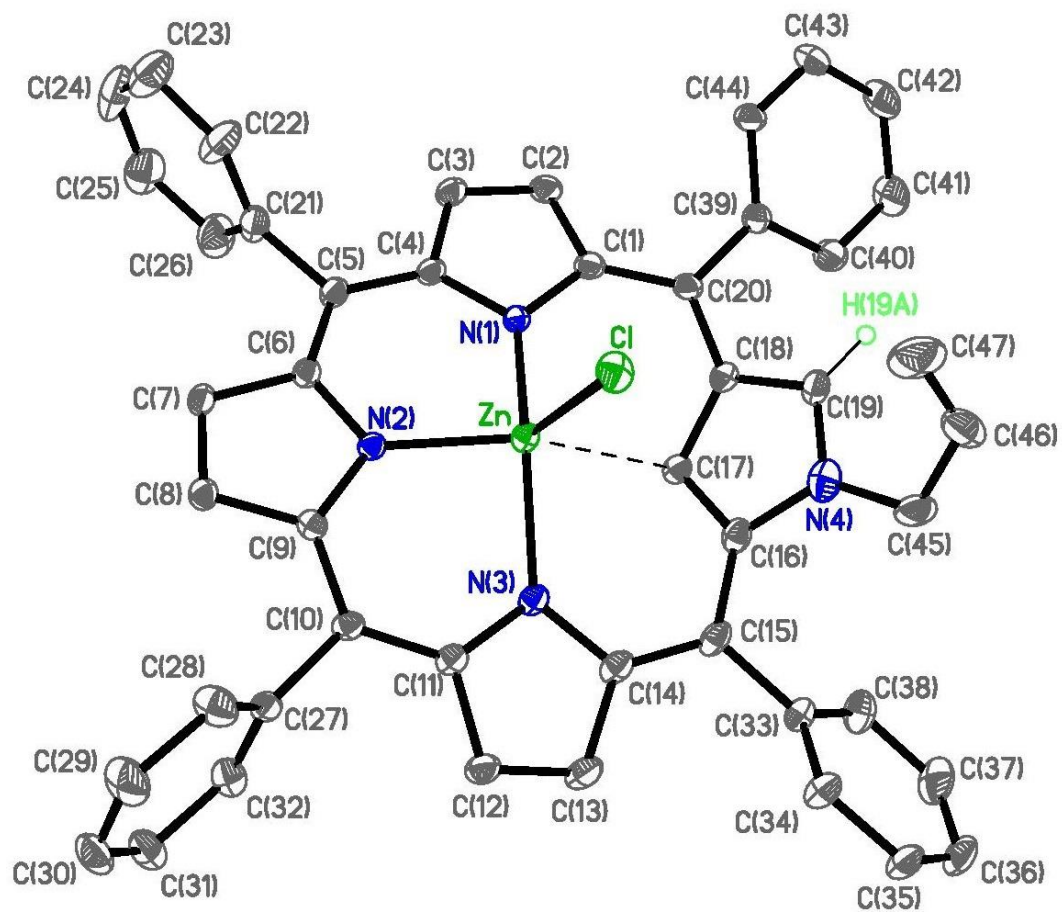

Fig. S2. X-ray structure of 3.

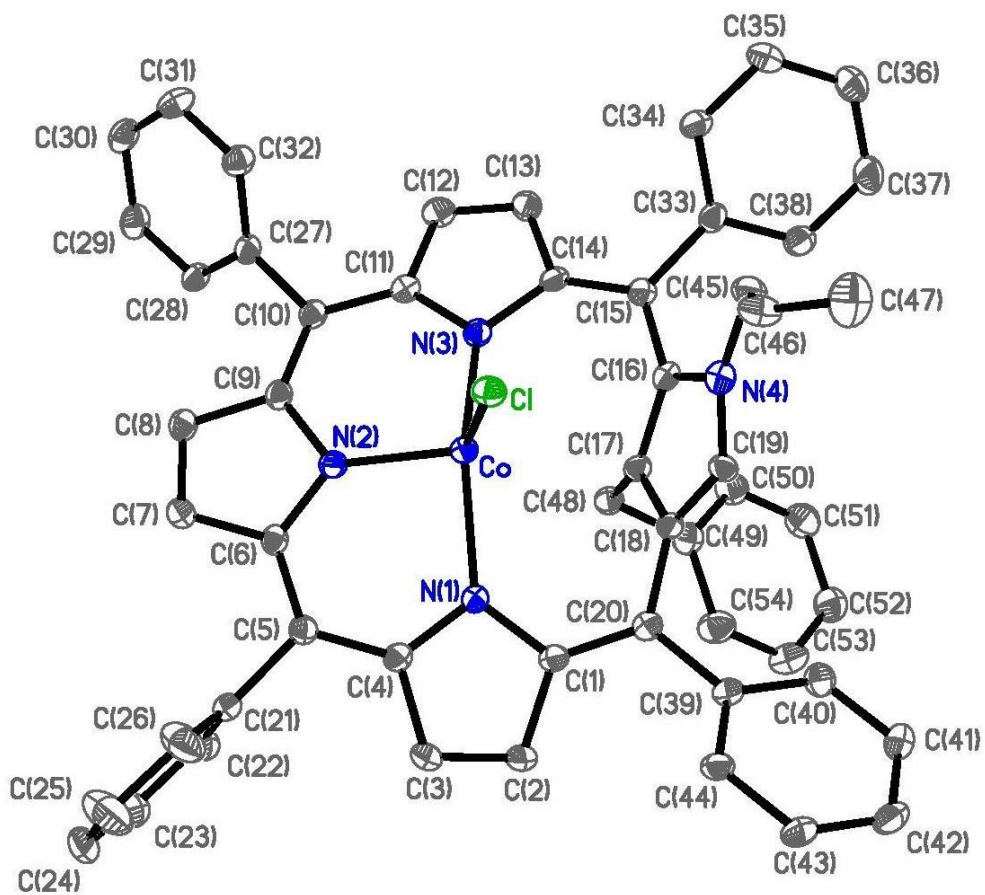

Fig. S3. X-ray structure of 7.

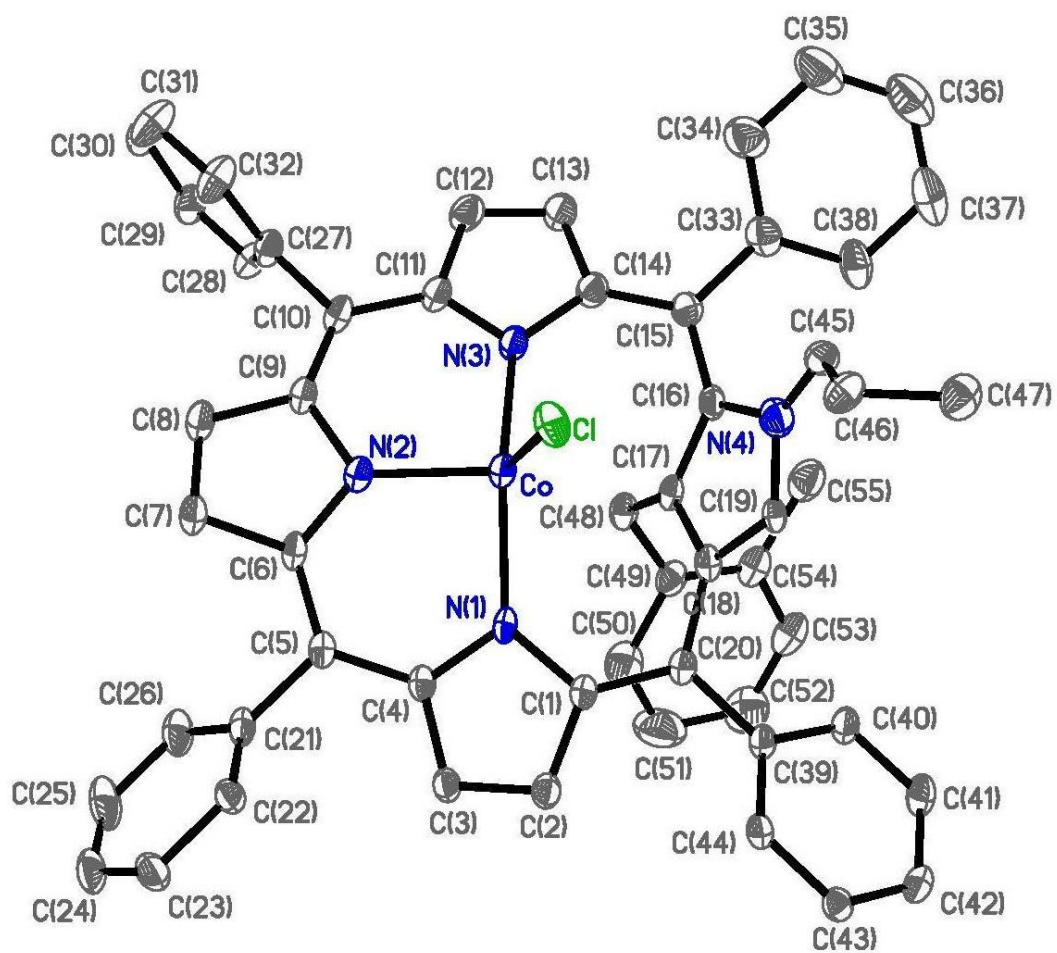

Fig. S4. X-ray structure of **8**.

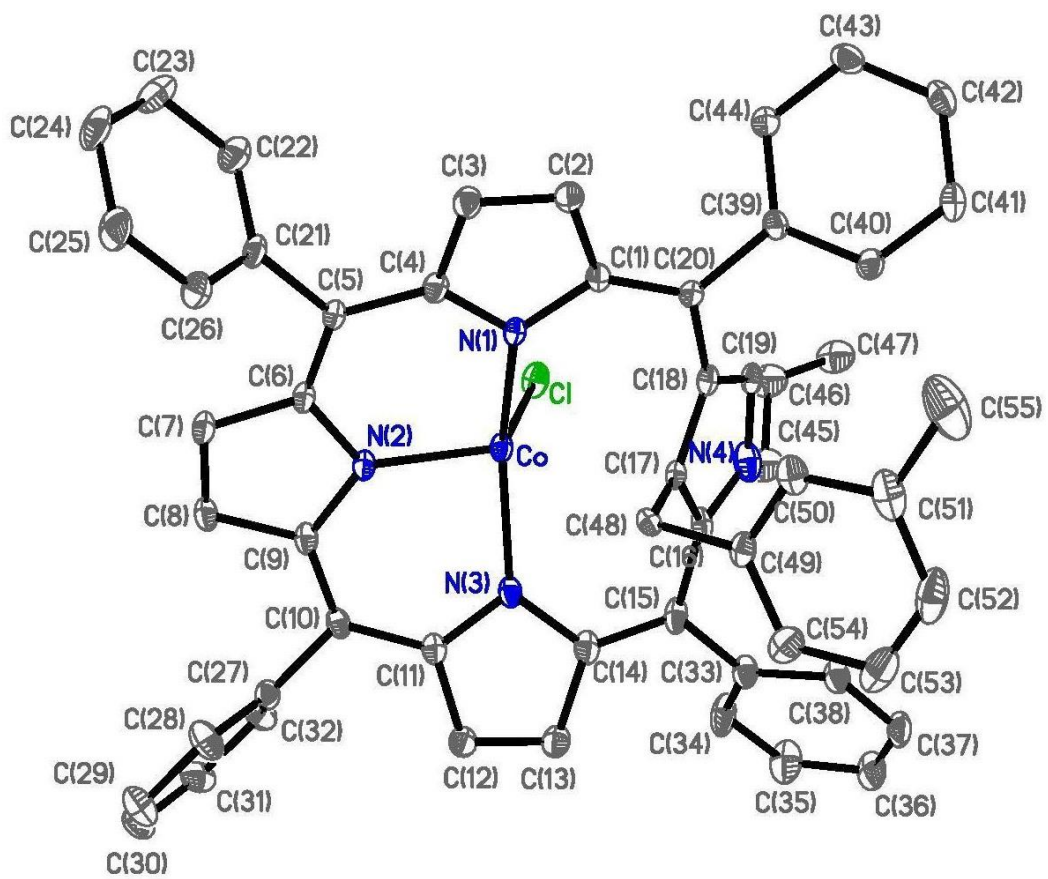

Fig. S5. X-ray structure of **9**.

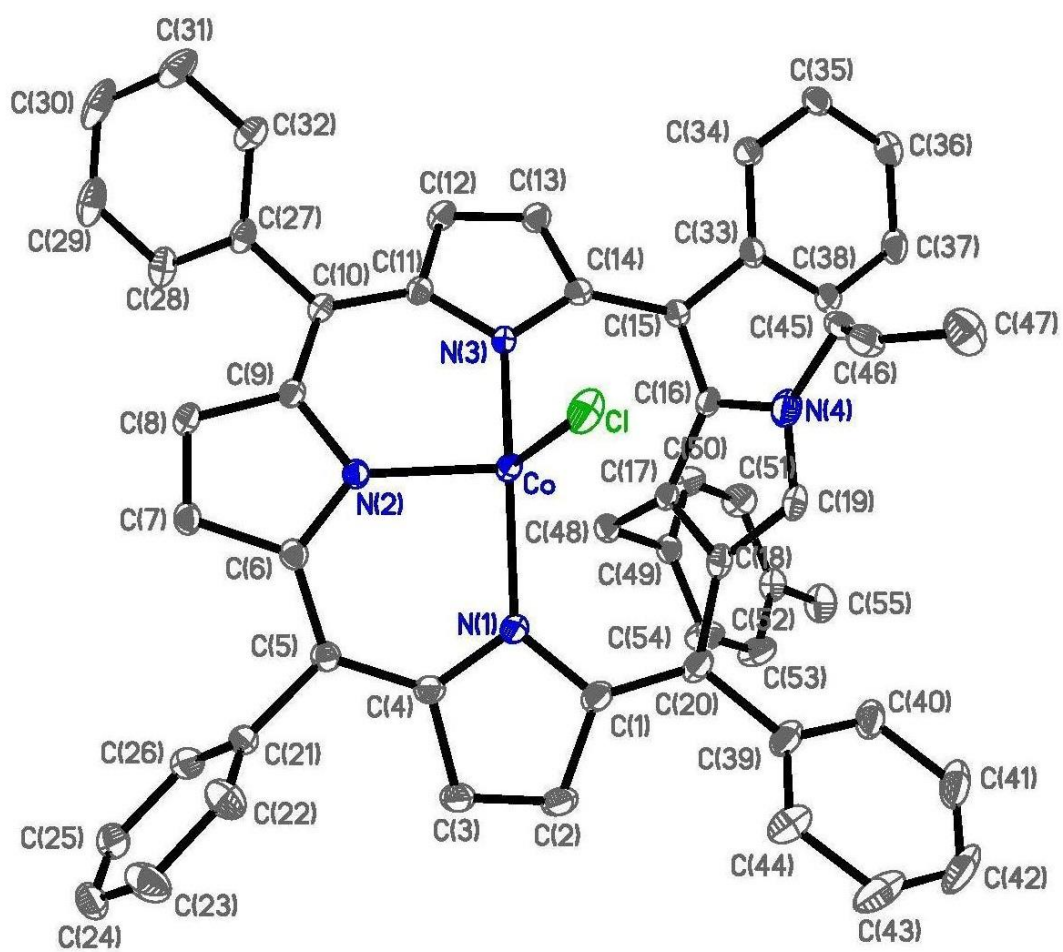

Fig. S6. X-ray structure of 10.



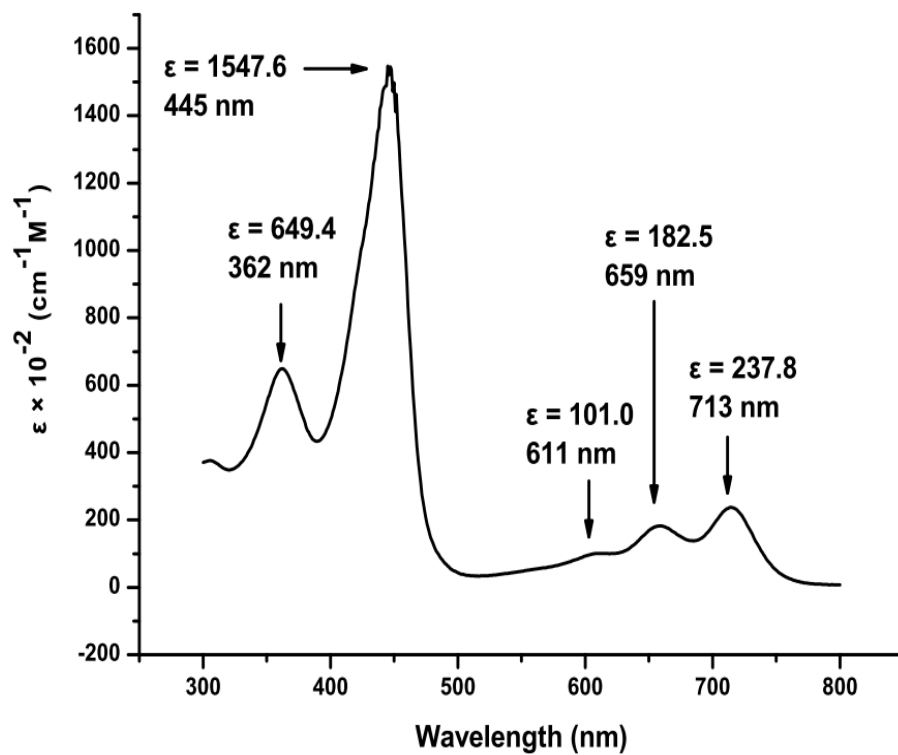

Fig. S7. UV-Vis spectra of **1** in CH<sub>2</sub>Cl<sub>2</sub> at 300 K (300 – 800 nm).

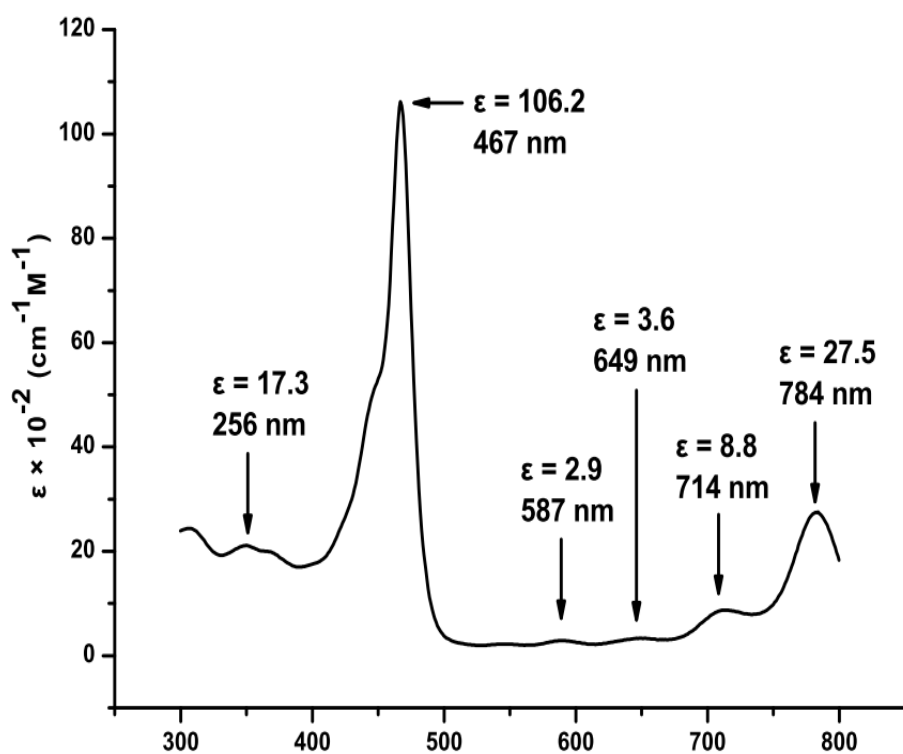

Fig. S8. UV-Vis spectra of **3** in CH<sub>2</sub>Cl<sub>2</sub> at 300 K (300 – 800 nm).

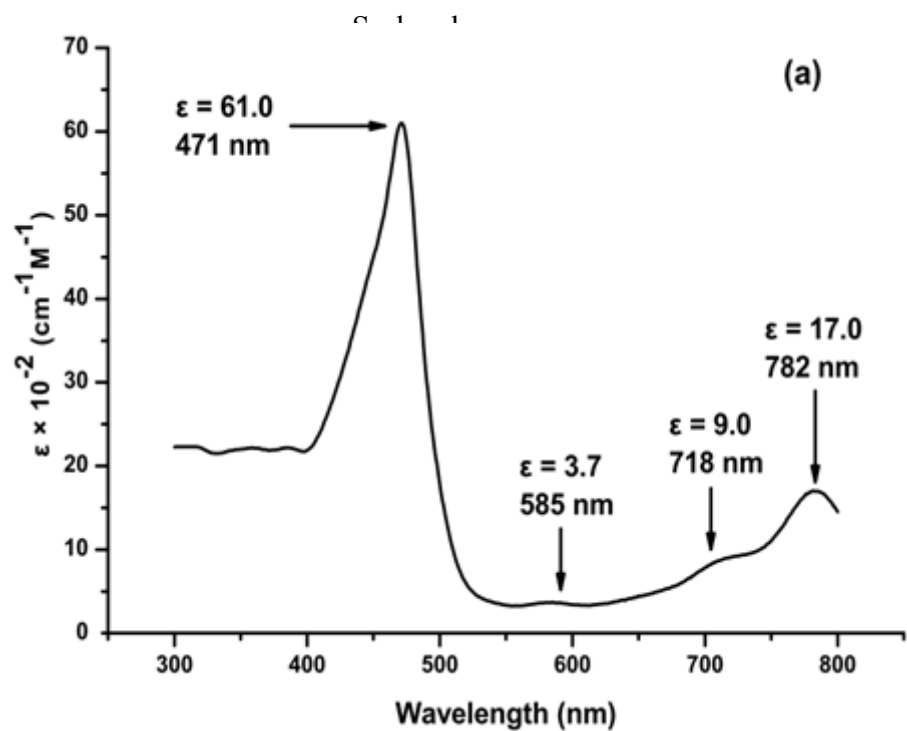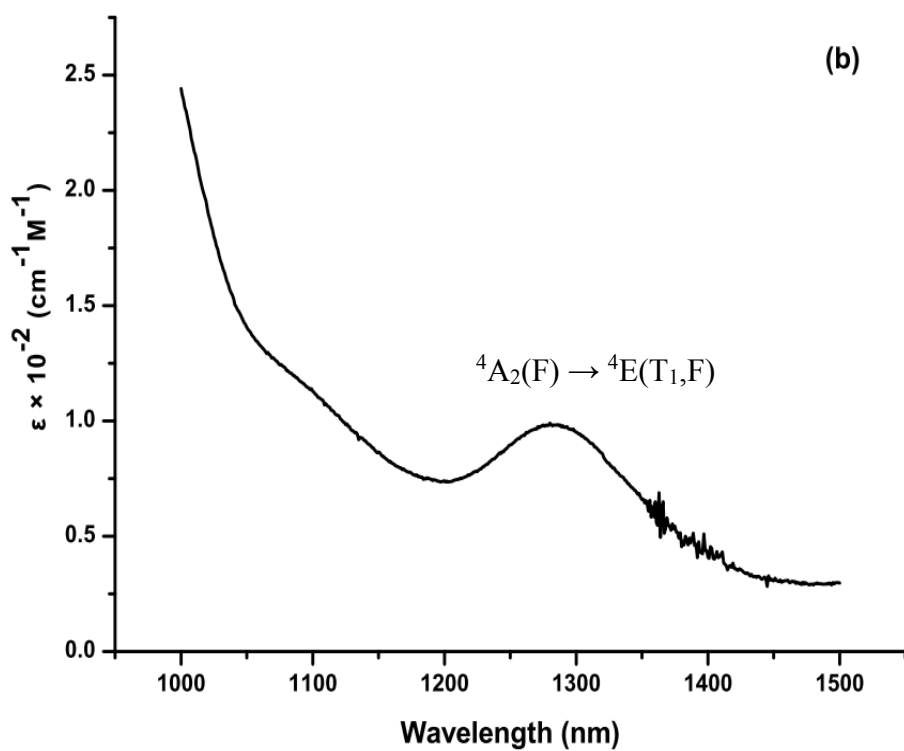

Fig. S9. UV-Vis-NIR spectra of **7** in  $\text{CDCl}_3$  at 300 K : (a) 300 – 800 nm (b) 1000 – 1500 nm

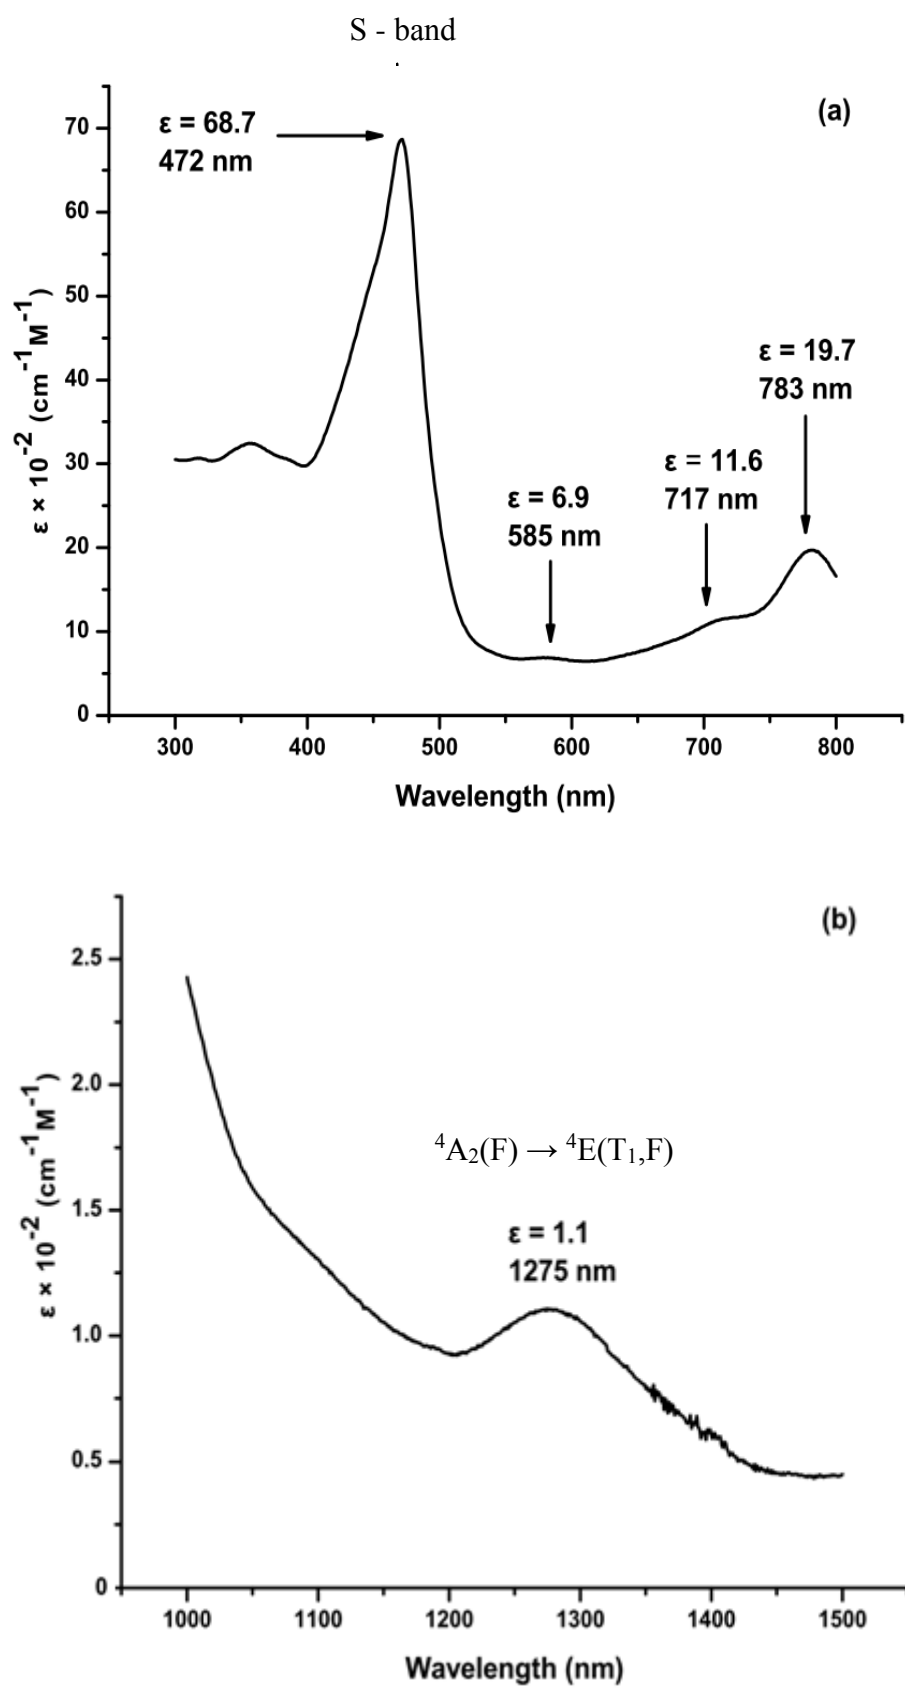

Fig. S10. UV-Vis-NIR spectra of **8** in  $\text{CDCl}_3$  at 300 K : (a) 300 – 800 nm (b) 1000 – 1500 nm

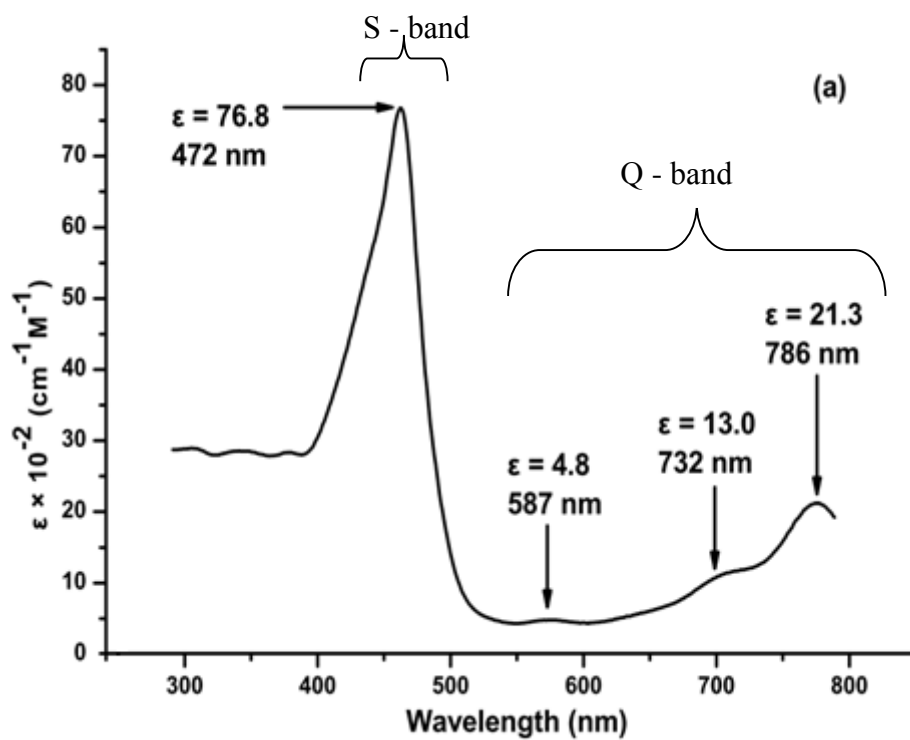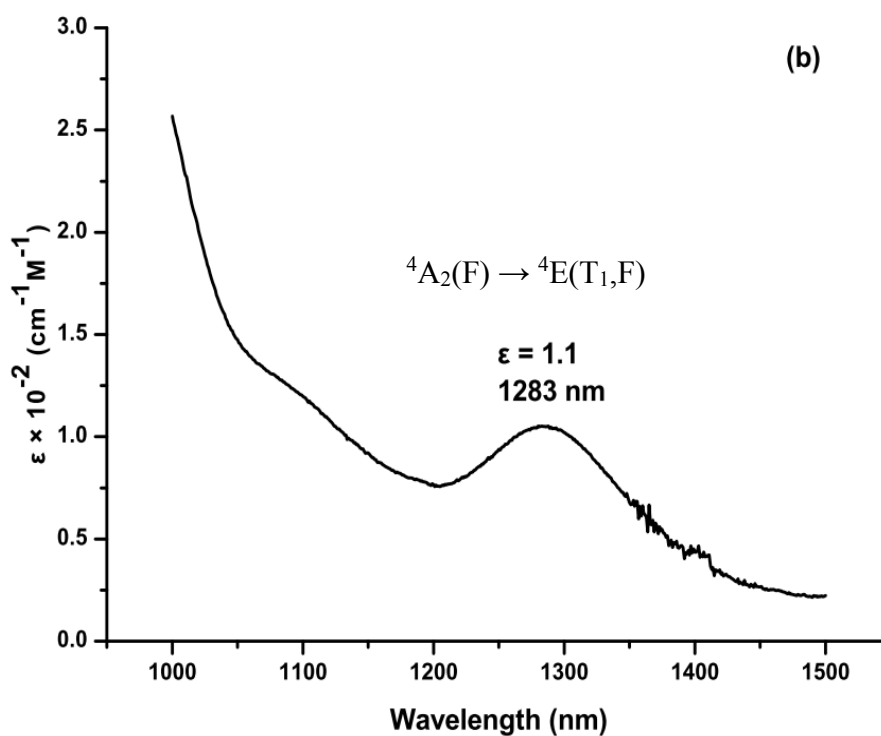

Fig. S11. UV-Vis-NIR spectra of **9** in  $\text{CDCl}_3$  at 300 K : (a) 300 – 800 nm (b) 1000 – 1500 nm

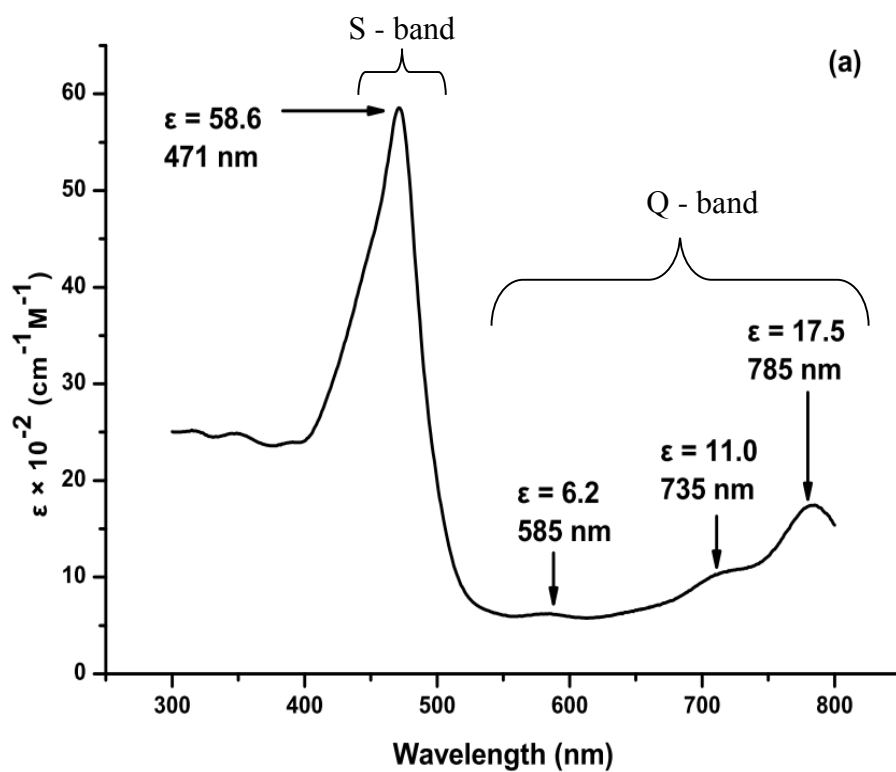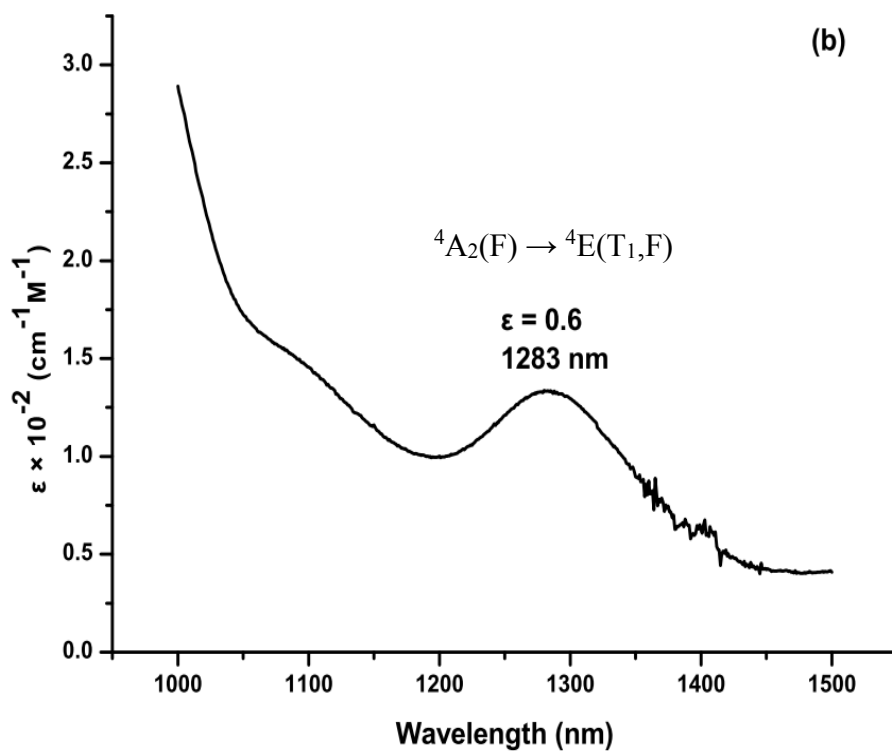

Fig. S12. UV-Vis-NIR spectra of **10** in  $\text{CDCl}_3$  at 300 K : (a) 300 – 800 nm (b) 1000 – 1500 nm

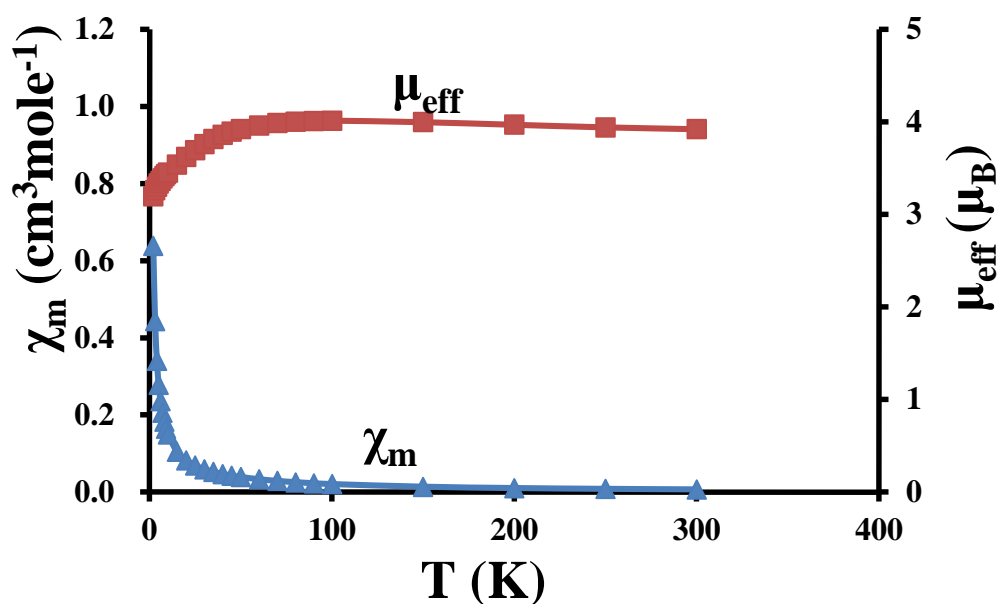

Fig. S13. Temperature variation of the molar magnetic susceptibility ( $\chi_m$ ) and effective magnetic moment ( $\mu_{\text{eff}}$ ) for the powder sample of **7** in the range of 2-300 K.

( $g_{\text{av}} = 2.0$ ,  $|D| = 35.6 \text{ cm}^{-1}$ ,  $R = 0.602 \%$ )

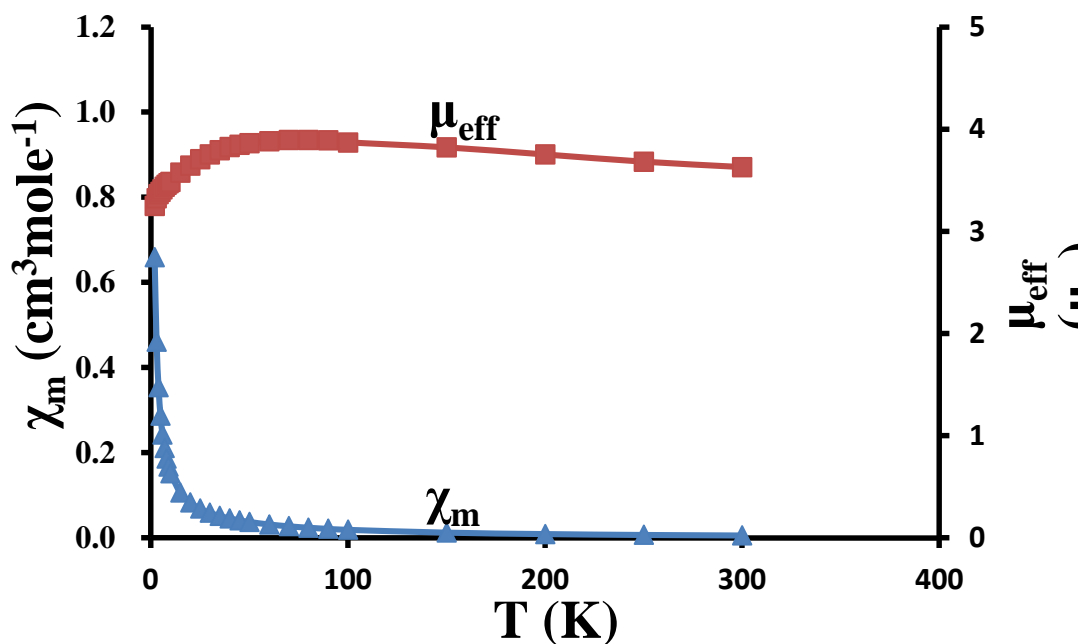

Fig. S14. Temperature variation of the molar magnetic susceptibility ( $\chi_m$ ) and effective magnetic moment ( $\mu_{\text{eff}}$ ) for the powder sample of **8** in the range of 2-300 K.

( $g_{\text{av}} = 2.42$ ,  $|D| = 30.7 \text{ cm}^{-1}$ ,  $R = 0.719 \%$ )

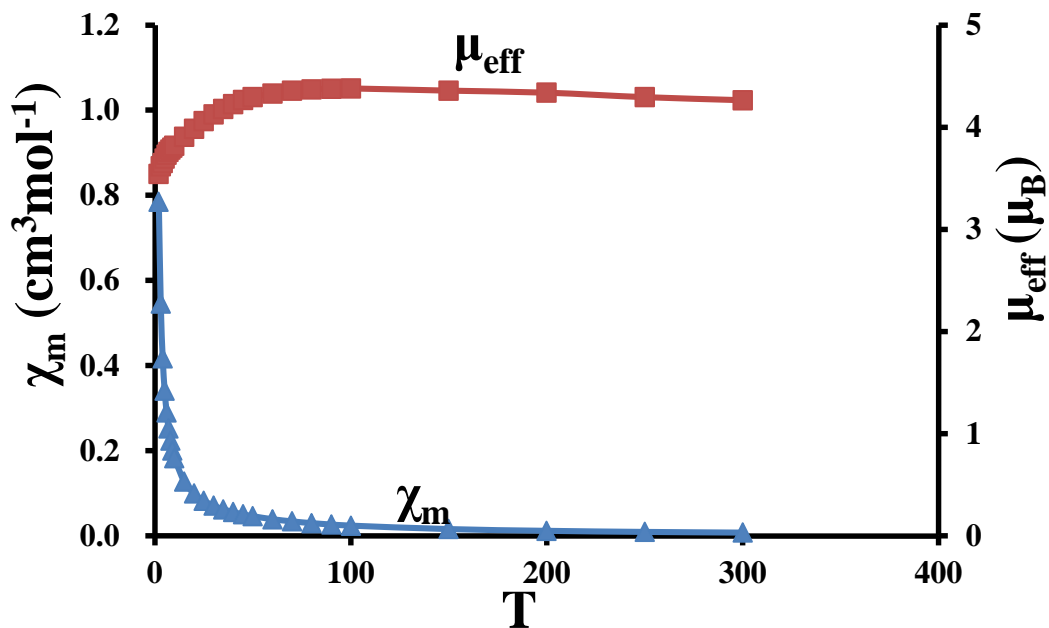

Fig. S15. Temperature variation of the molar magnetic susceptibility ( $\chi_m$ ) and effective magnetic moment ( $\mu_{\text{eff}}$ ) for the powder sample of **9** in the range of 2-300 K.

( $g_{\text{av}} = 2.10$ ,  $|D| = 42.0 \text{ cm}^{-1}$ ,  $R = 0.588 \%$ )

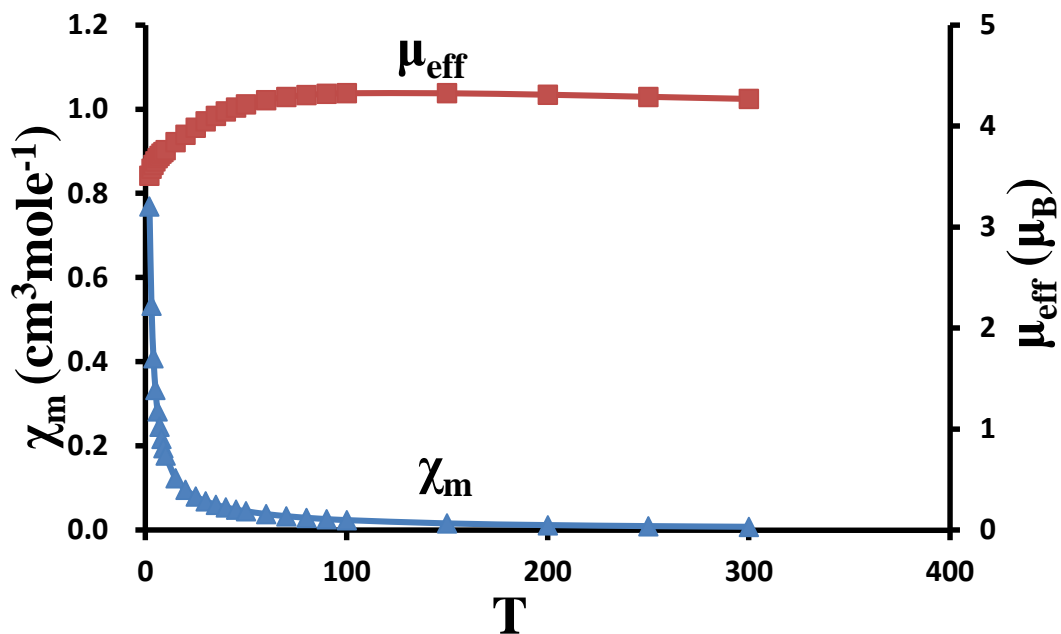

Fig. S16. Temperature variation of the molar magnetic susceptibility ( $\chi_m$ ) and effective magnetic moment ( $\mu_{\text{eff}}$ ) for the powder sample of **10** in the range of 2-300 K.

( $g_{\text{av}} = 2.09$ ,  $|D| = 46.9 \text{ cm}^{-1}$ ,  $R = 0.574 \%$ )

(a)

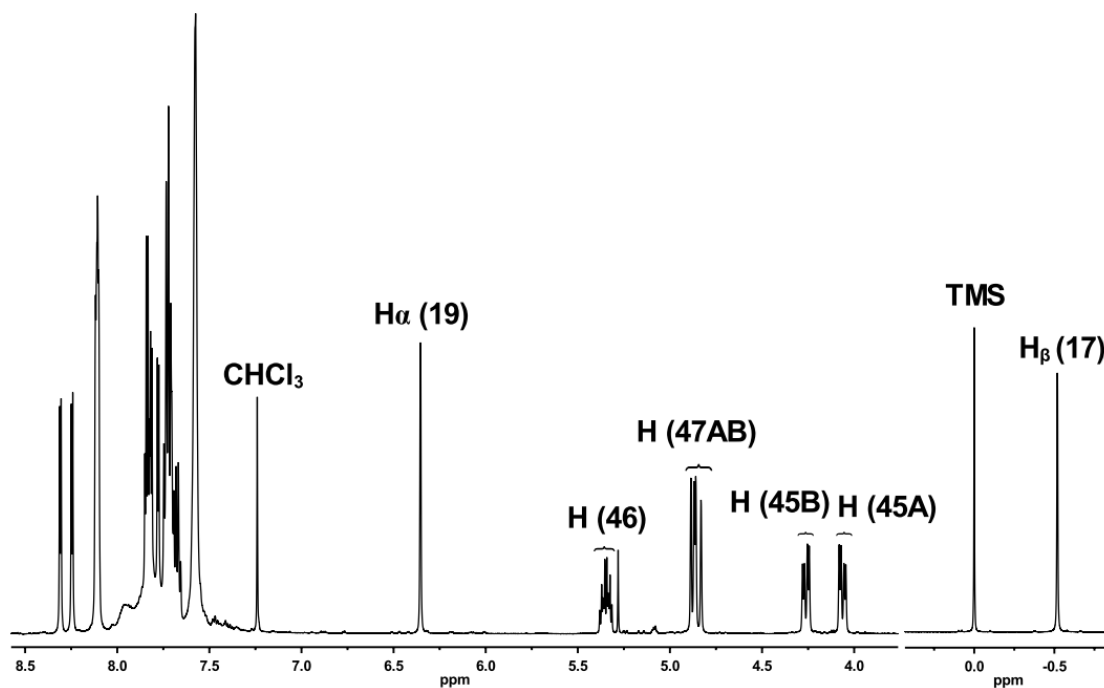

(b)

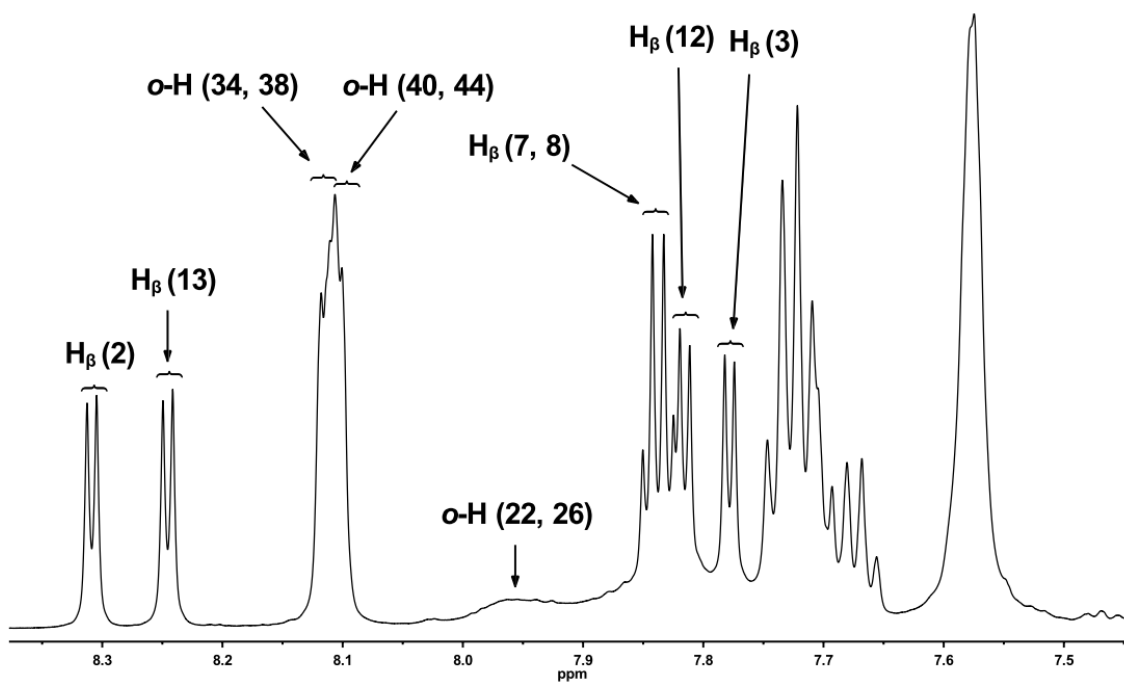

Fig. S17.  $^1\text{H}$  NMR spectra for **3** at 599.93 MHz in  $\text{CDCl}_3$  at 293 K: (a) entire spectrum; (b) expansion of the region of 7.4–8.4 ppm of (a). Chemical shifts are in ppm from TMS at 0 ppm.



**Table S1.** X-ray,  $^1\text{H}$  (599.93 MHz) and  $^{13}\text{C}$  (150.87 MHz) NMR chemical shifts of the N(4)-CH(19)(Ar) [or N(4)<sup>+</sup>=CH(19)(Ar)] fragment in CDCl<sub>3</sub> at 293 K for **1** – **3**, **7** – **10**.

| Compound                                           | $\delta$ ( $^1\text{H}$ )<br>(ppm) |          | $\delta$ ( $^{13}\text{C}$ )<br>(ppm) <sup>c</sup> |          | X-ray<br>dihedral angle $\varphi$ ( $^\circ$ ) <sup>d</sup> |      |      |       | X-ray<br>Coordination<br>Geometry <sup>e</sup> | Major<br>canonical<br>form <sup>f</sup> |
|----------------------------------------------------|------------------------------------|----------|----------------------------------------------------|----------|-------------------------------------------------------------|------|------|-------|------------------------------------------------|-----------------------------------------|
|                                                    | [CH(17)] <sup>a</sup>              | [CH(19)] | [CH(17)]                                           | [CH(19)] | N(1)                                                        | N(2) | N(3) | C(17) |                                                |                                         |
| <b>1</b> (2-NC <sub>3</sub> H <sub>5</sub> NCTPPH) | 1.41(s)                            | 7.25(s)  | 105.8(s)                                           | 134.9(s) | 6.9                                                         | 10.3 | 11.0 | 24.4  | -                                              | -                                       |
| <b>2</b> (Mn <sup>3+</sup> )                       | -                                  | -        | -                                                  | -        | 7.7                                                         | 8.2  | 8.3  | 8.8   | DSBP                                           | Dipolar                                 |
| <b>3</b> (Zn <sup>2+</sup> )                       | -0.53(d)                           | 6.34(d)  | 74.6(s)                                            | 119.8(s) | 15.2                                                        | 10.1 | 12.4 | 48.4  | DT                                             | Covalent                                |
|                                                    | (1.8) <sup>b</sup>                 | (1.8)    |                                                    |          |                                                             |      |      |       |                                                |                                         |
| <b>7</b> (Co <sup>2+</sup> -benzyl)                | -                                  | -        | -                                                  | -        | 10.9                                                        | 2.0  | 11.6 | 56.4  | DT                                             | Covalent                                |
| <b>8</b> (Co <sup>2+</sup> - <i>o</i> -xylyl)      | -                                  | -        | -                                                  | -        | 19.2                                                        | 5.5  | 17.1 | 60.5  | DT                                             | Covalent                                |
| <b>9</b> (Co <sup>2+</sup> - <i>m</i> -xylyl)      | -                                  | -        | -                                                  | -        | 16.5                                                        | 5.3  | 16.1 | 56.2  | DT                                             | Covalent                                |
| <b>10</b> (Co <sup>2+</sup> - <i>p</i> -xylyl)     | -                                  | -        | -                                                  | -        | 17.6                                                        | 1.8  | 18.9 | 58.3  | DT                                             | Covalent                                |

<sup>a</sup> s = singlet, d = doublet. <sup>b</sup>  $^4J$  ( $^1\text{H}$ - $^1\text{H}$ ) coupling constant in Hz. <sup>c</sup> Broad band  $^{13}\text{C}$ . <sup>d</sup> The dihedral angles between the plane defined by N(1) N(2) N(3) and the pyrrole planes [N(1), N(2), N(3), C(17)], respectively. <sup>e</sup> DSBP = distorted square-based pyramid, DT = distorted tetrahedron. <sup>f</sup> Resonance contributors for dipolar form and covalent form.

## § Derivation of $D_{xx}$ , $D_{yy}$ , $D_{zz}$ and $D$ :

The ZFS parameters (D and E) are calculated from the elements of the diagonalized  $\mathbf{D}$  tensor (see eq S1) :

$$D = D_{zz} - \frac{1}{2} (D_{xx} + D_{yy}) \quad ; \quad E = \frac{1}{2} (D_{xx} - D_{yy}) \dots \dots \dots (S1)$$

In a highly qualitative nature and we restrict our attention to the metal d-based molecular orbitals (Fig. 4), the general expressions for  $D_{kl}$  of distorted tetrahedral  $Co^{2+}$  complexes (7-10,  $S = \frac{3}{2}$ ) with local  $C_{2v}$  symmetry from the contributions of the excited states with the same spin as the ground states reduce to equations (S2) – (S4) for  $D_{xx}$ ,  $D_{yy}$  and  $D_{zz}$  :

$$1. D_{xx} = -\frac{\zeta_{eff}^2}{9} \left\{ \frac{\langle d_{yz} | \hat{l}_x | d_{xy} \rangle \langle d_{xy} | \hat{l}_x | d_{yz} \rangle}{\varepsilon_{xy} - \varepsilon_{yz}} + \frac{\langle d_{xz} | \hat{l}_x | d_{x^2-y^2} \rangle \langle d_{x^2-y^2} | \hat{l}_x | d_{xz} \rangle}{\varepsilon_{x^2-y^2} - \varepsilon_{xz}} + \frac{\langle d_{xz} | \hat{l}_x | d_{z^2} \rangle \langle d_{z^2} | \hat{l}_x | d_{xz} \rangle}{\varepsilon_{z^2} - \varepsilon_{xz}} \right\} = -\frac{\zeta_{eff}^2}{9} \left( \frac{1}{\varepsilon_{xy} - \varepsilon_{yz}} + \frac{1}{\varepsilon_{x^2-y^2} - \varepsilon_{xz}} + \frac{3}{\varepsilon_{z^2} - \varepsilon_{xz}} \right) \dots \dots \dots (S2)$$

$$2. D_{yy} = -\frac{\zeta_{eff}^2}{9} \left\{ \frac{\langle d_{xz} | \hat{l}_y | d_{xy} \rangle \langle d_{xy} | \hat{l}_y | d_{xz} \rangle}{\varepsilon_{xy} - \varepsilon_{xz}} + \frac{\langle d_{yz} | \hat{l}_y | d_{z^2} \rangle \langle d_{z^2} | \hat{l}_y | d_{yz} \rangle}{\varepsilon_{z^2} - \varepsilon_{yz}} + \frac{\langle d_{yz} | \hat{l}_y | d_{x^2-y^2} \rangle \langle d_{x^2-y^2} | \hat{l}_y | d_{yz} \rangle}{\varepsilon_{x^2-y^2} - \varepsilon_{yz}} \right\} = -\frac{\zeta_{eff}^2}{9} \left( \frac{1}{\varepsilon_{xy} - \varepsilon_{xz}} + \frac{1}{\varepsilon_{x^2-y^2} - \varepsilon_{yz}} + \frac{3}{\varepsilon_{z^2} - \varepsilon_{yz}} \right) \dots \dots \dots (S3)$$

$$3. D_{zz} = 0 \dots \dots \dots (S4)$$

$$\text{Hence, } D = D_{zz} - \frac{1}{2} (D_{xx} + D_{yy}) = \frac{\zeta_{eff}^2}{9} \left( \frac{1}{\Delta_1} + \frac{1}{\Delta_3} + \frac{3}{\Delta_2} \right) \dots \dots \dots (S5)$$

where

$$E = 0 \dots \dots \dots (S6)$$

$$\Delta_1 = \varepsilon(d_{xy}) - \varepsilon(d_{xz}) \doteq \varepsilon(d_{xy}) - \varepsilon(d_{yz})$$

$$\Delta_2 = \varepsilon(d_z^2) - \varepsilon(d_{xz}) \doteq \varepsilon(d_z^2) - \varepsilon(d_{yz})$$

$$\Delta_3 = \varepsilon(d_{x^2-y^2}) - \varepsilon(d_{xz}) \doteq \varepsilon(d_{x^2-y^2}) - \varepsilon(d_{yz})$$

Ref.

1' J. Cirera, E. Ruiz, S. Alvarez, F. Neese and J. Kortus, *Chem. Eur. J.* 2009, **15**, 4078-4087.

2' S. Gomez-Coca, E. Cremades, N. Aliaga-Alcalde and E. Ruiz, *J. Am. Chem. Soc.* 2013, **135**, 7010-7018.

3' S. Gomez-Coca, D. Aravena, R. Morales and E. Ruiz, *Coord. Chem. Rev.* 2015, **289-290**, 379-392.

.....
